# Supplementary material
Source: PubMed Central journal article supplement (PMC10164793)
Supplement: ajcr0013-1209-f10.pdf [file ajcr0013-1209-f10.pdf]

## NES L747 mutation of EGFR drives tumorigenesis

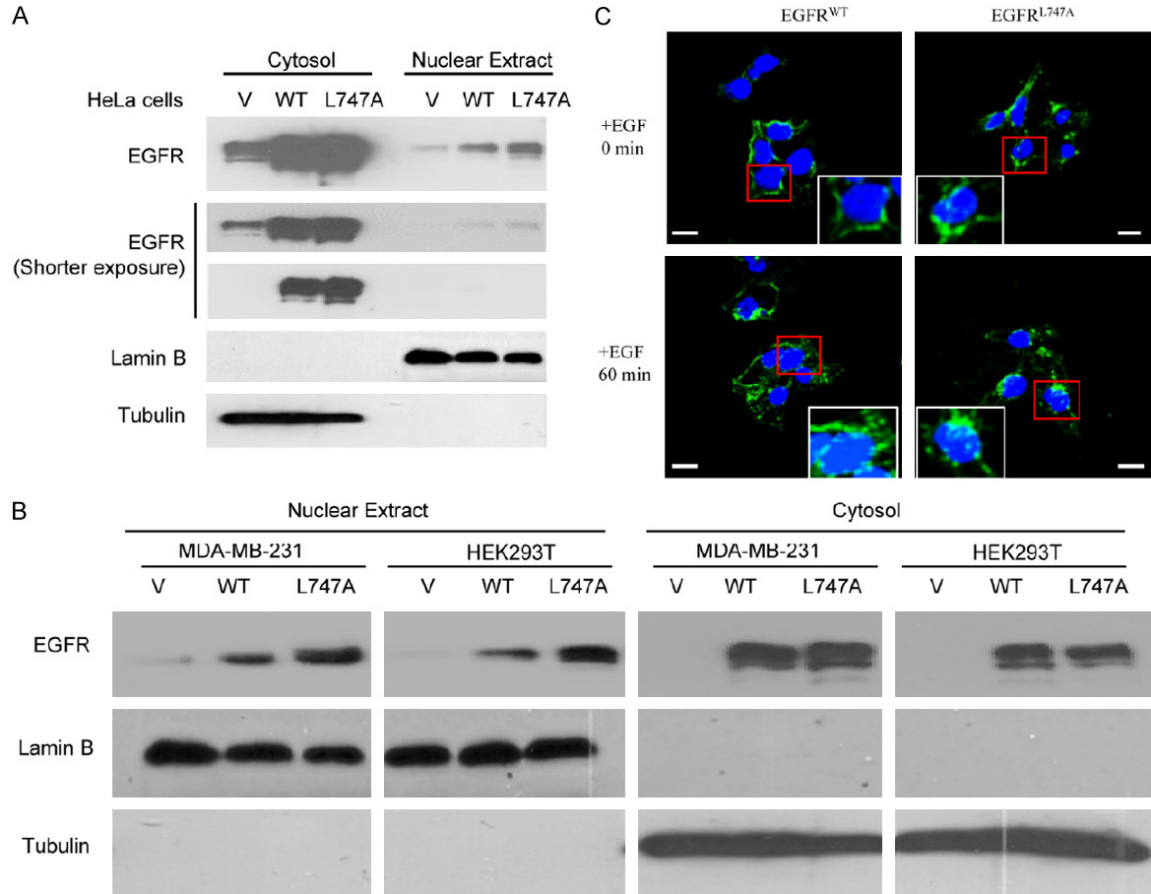

**Figure S1.** Mutation of EGFR at L747 increases its nuclear accumulation in human cancer cells. (A and B) Myc-tagged EGFR mutant-expressing plasmids were transiently transfected into HeLa (A), MDA-MB-231 (B), and HEK293T (B) cells. The nuclear extract and cytosol were immunoblotted with the indicated antibodies. (C) HEK293T cells expressing GFP-fusion protein of EGFR WT and NES mutant (EGFR L747A) were starved overnight, and then stimulated with or without EGF (50 ng/ml) for 60 min. The cells were fixed and observed under confocal microscopy and representative images of nuclear localization were shown in insets. WT, wild-type. Bar, 10  $\mu$ m.

## NES L747 mutation of EGFR drives tumorigenesis

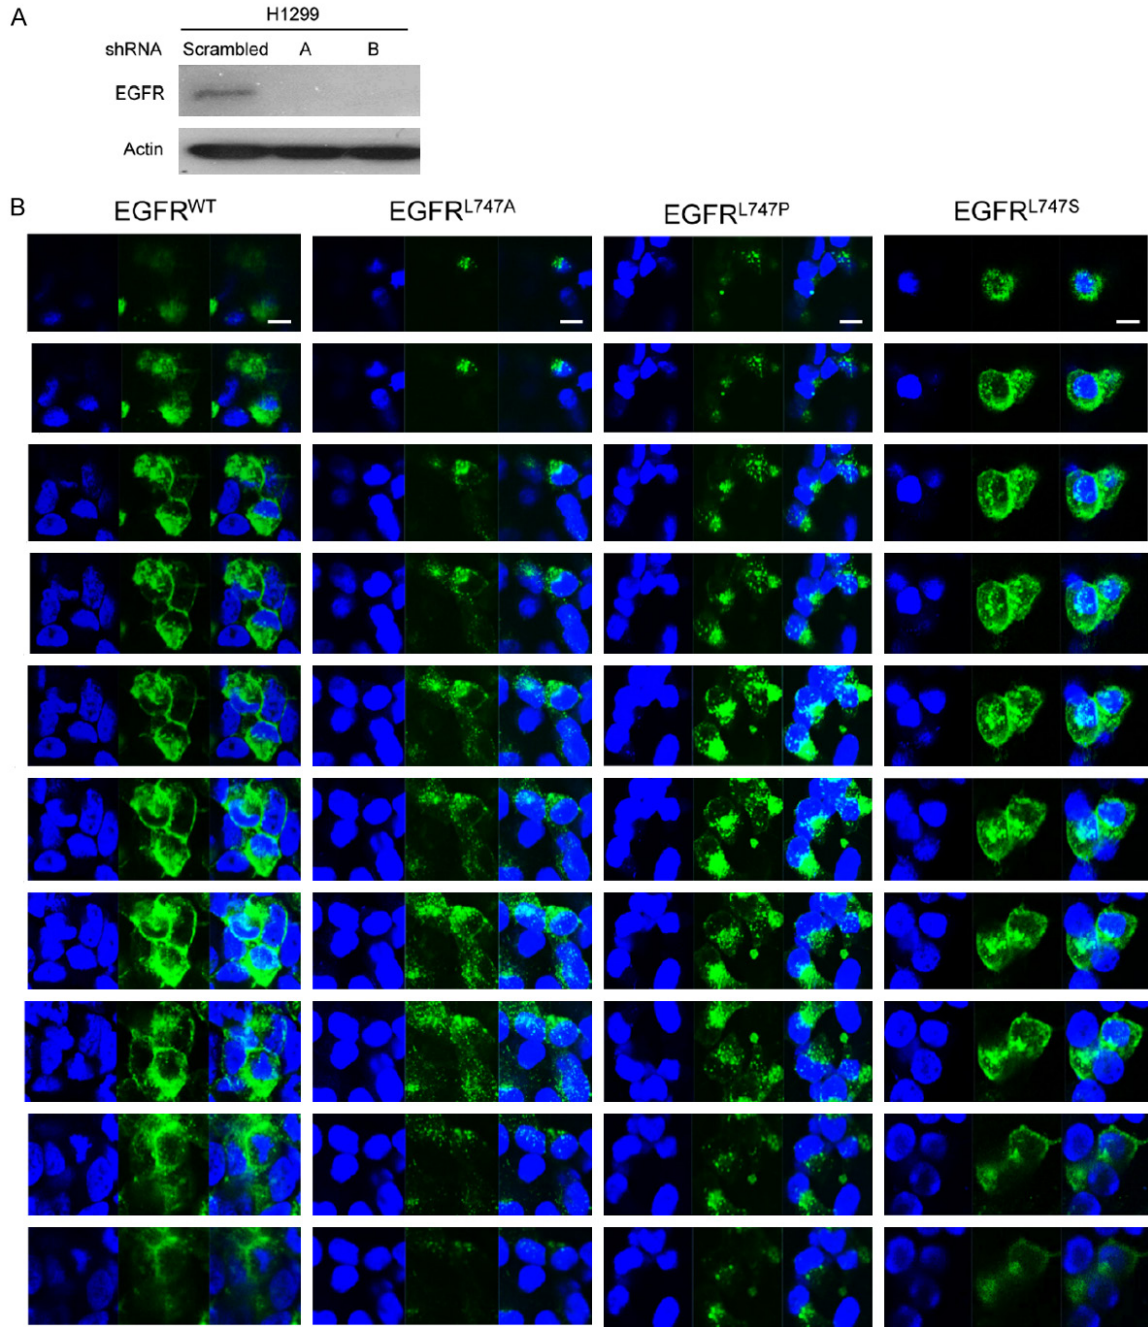

**Figure S2.** Confocal Z-stack scanning shows EGFR localization of H1299 cells expressing EGFR WT and L747 mutants in the nuclei. A. Knock-down of EGFR in H1299 cells with scrambled and shRNA EGFR-A and -B. B. H1299 cells expressing GFP-fused EGFR wild-type and L747 mutants were serum starved for 12 hours and stimulated with 60 ng/ml EGF for 30 min. The cells were fixed and permeabilized. The cell nuclei were visualized with DAPI. Confocal Z-stack scanning of the slides was performed using a LSM710 fluorescence confocal microscope. Serial confocal images 1  $\mu$ m apart along the Z axis were obtained. Bar, 10  $\mu$ m.

## NES L747 mutation of EGFR drives tumorigenesis

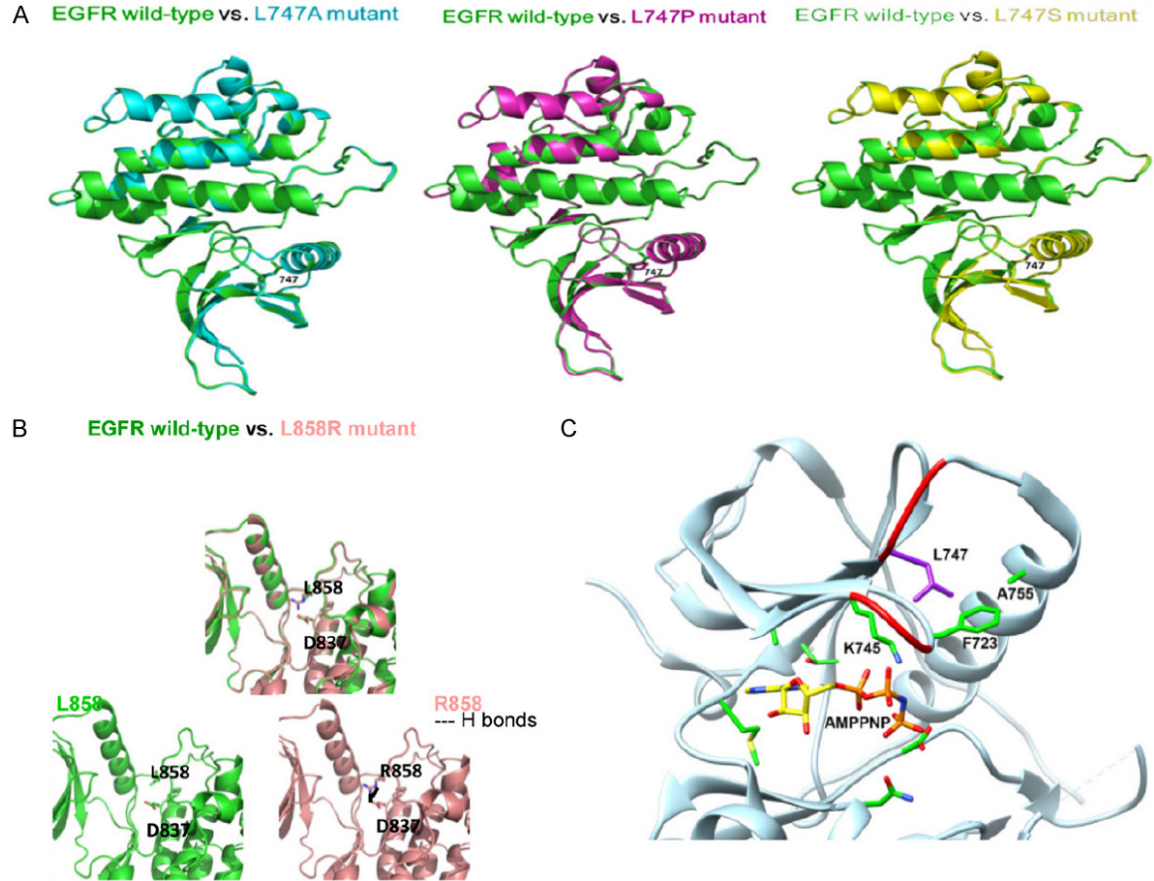

**Figure S3.** NES mutation of EGFR does not significantly affect 3D conformation of the kinase domain and ATP inhibitor binding site. A. The 3D model of the kinase domain of human EGFR L747 mutants were constructed using 1M17 as the template for homology modeling using the program (PS)2. The figures were produced by PyMOL. B. The inhibitor binding site of human EGFR L858R mutant kinase domain (PDB code 2ITV). C. The residue of L747 is colored purple; the key residues interacting with L747 or AMPPNP are colored green. The loop where L747 locates and P loop are shown in red ribbons. The AMPPNP molecule is displayed as the stick model with yellow C atoms. The figure was produced by using matchmaker tool of UCSF Chimera.

# NES L747 mutation of EGFR drives tumorigenesis

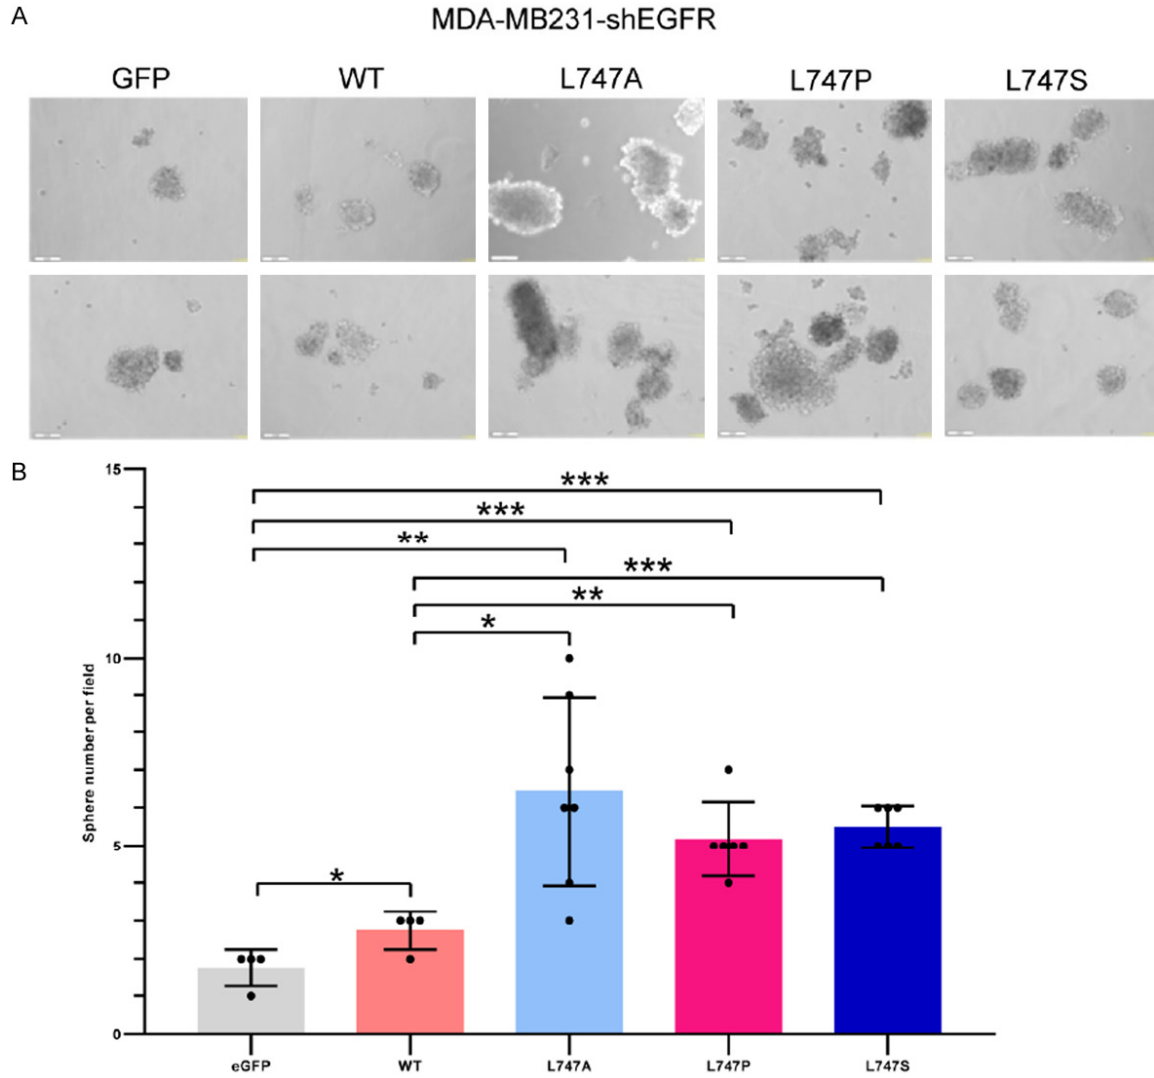

**Figure S4.** EGFR NES mutants significantly increase tumorsphere numbers in MDA-MB-231 cells. (A) MDA-MB-231 cells stably re-expressing EGFR WT and L747 mutants were performed in tumorsphere formation assay. Bar, 100  $\mu$ m. (B) Bar graphs of tumorsphere numbers in (A) are presented as the mean value  $\pm$  SE. \* $p$  < 0.05, \*\* $p$  < 0.01, \*\*\* $p$  < 0.001.

# NES L747 mutation of EGFR drives tumorigenesis

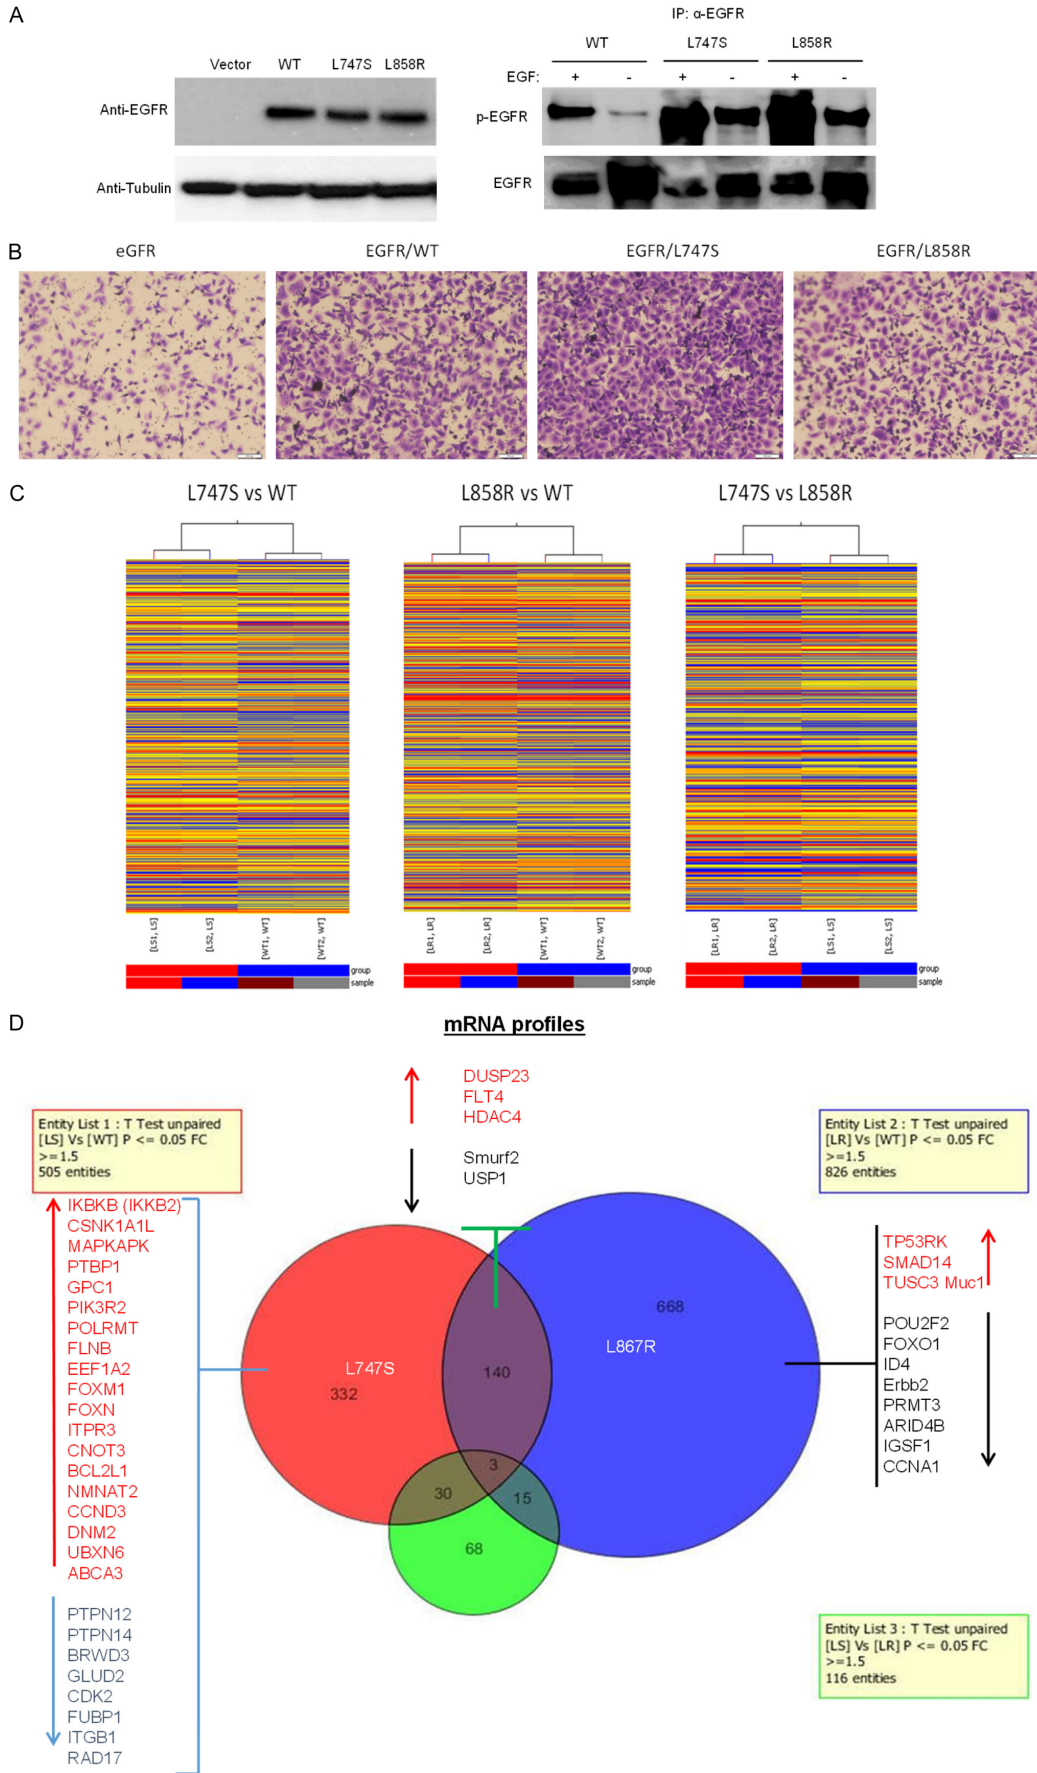

## NES L747 mutation of EGFR drives tumorigenesis

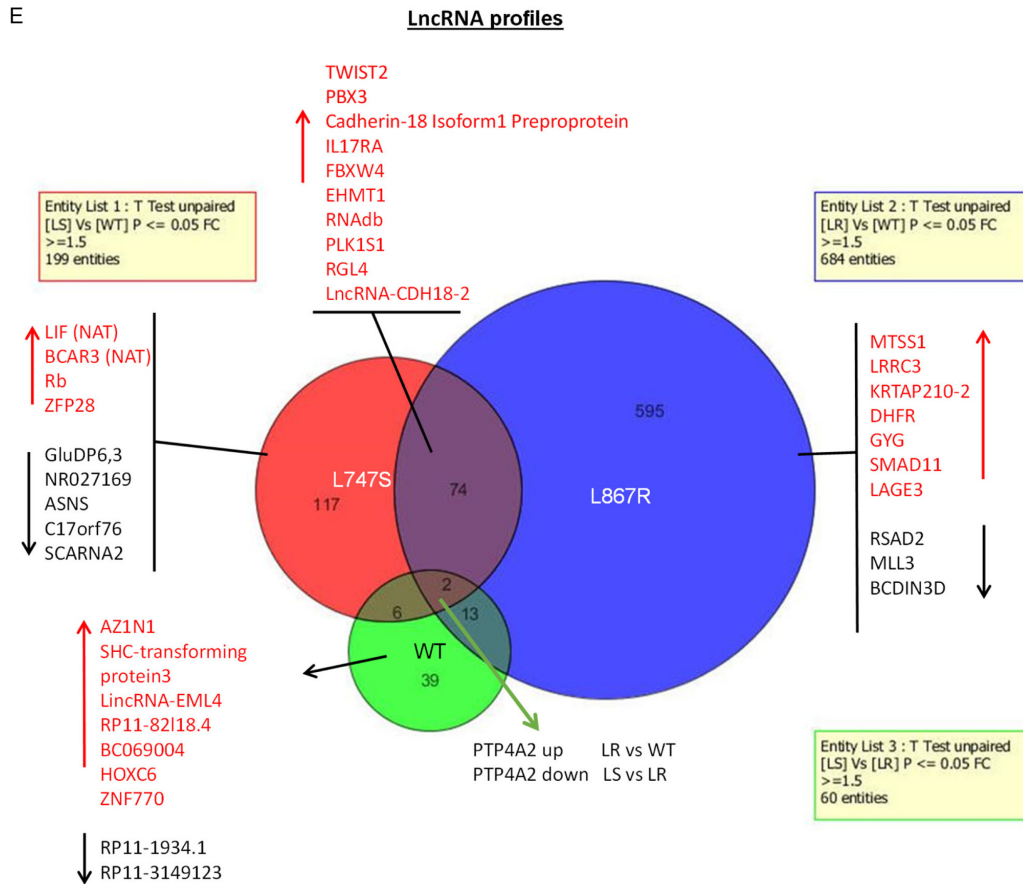

**Figure S5.** Transcriptome profiles of H1299 cells expressing EGFR<sup>WT</sup>, EGFR<sup>L747S</sup>, and EGFR<sup>L858R</sup>. (A) Phosphorylated and total EGFR protein levels of the reconstituted expression of the WT and L747S and L858R mutants of EGFR were determined using immunoblotting analyses with indicated antibodies. (B) Invasive potential of the cell lines were determined using Boyden chamber assay. Bar, 200  $\mu$ m. (C-E) Two sets of RNA samples from each stable cell line were used for statistical analysis. Total RNAs isolated from two sets of these stable cell lines were used for Microarray analyses. Heat maps of gene expression profiles (C), protein coding gene profiles (D), and long non-coding RNA (LncRNA) profiles (E) in the cell lines expressing EGFR<sup>WT</sup>, EGFR<sup>L747S</sup> and EGFR<sup>L858R</sup>.

**Table S2.** Limiting-dilution transplantation assay of cancer cells expressing EGFR NES mutant and its nuclear translocation-deficient mutant

| Cell line | Cell dilution   | Mouse number | Tumor formation rate (%) |
|-----------|-----------------|--------------|--------------------------|
| WT        | $1 \times 10^5$ | 6            | 3/6 (50)                 |
|           | $5 \times 10^4$ | 6            | 0/6 (0)                  |
| WT/AA     | $1 \times 10^5$ | 6            | 1/6 (16.7)               |
|           | $5 \times 10^4$ | 6            | 0/6 (0)                  |
| L747P     | $1 \times 10^5$ | 6            | 5/6 (83.3)               |
|           | $5 \times 10^4$ | 6            | 4/6 (66.7)               |
| L747P/AA  | $1 \times 10^5$ | 6            | 2/6 (33.3)               |
|           | $5 \times 10^4$ | 6            | 2/6 (33.3)               |
| L747S     | $1 \times 10^5$ | 4            | 4/4 (100)                |
|           | $5 \times 10^4$ | 6            | 5/6 (83.3)               |
| L747S/AA  | $1 \times 10^5$ | 6            | 2/6 (33.3)               |
|           | $5 \times 10^4$ | 6            | 2/6 (33.3)               |

## NES L747 mutation of EGFR drives tumorigenesis

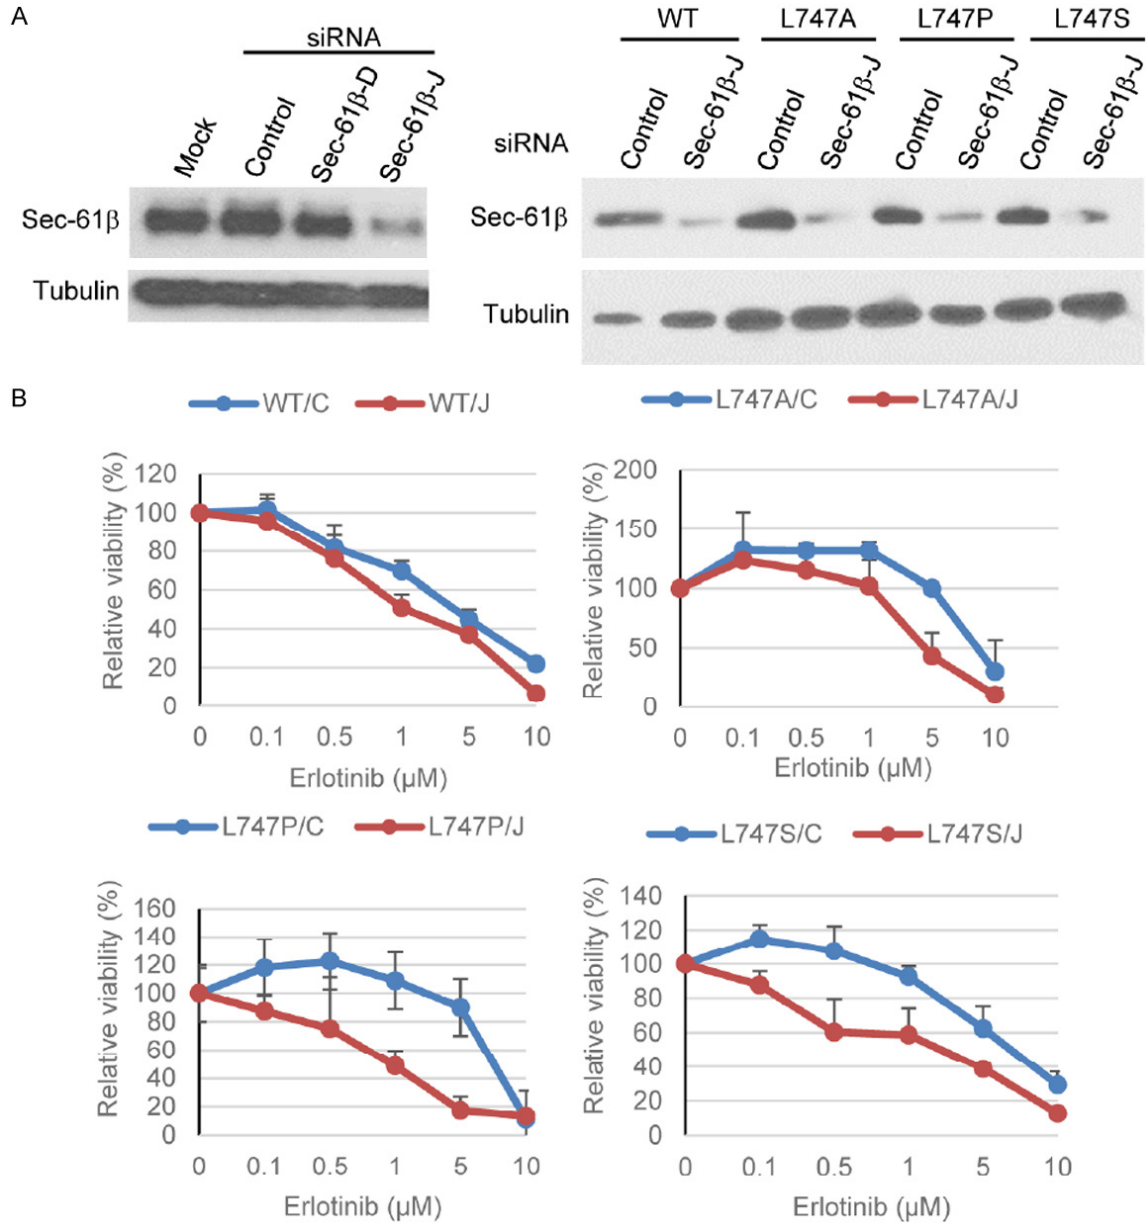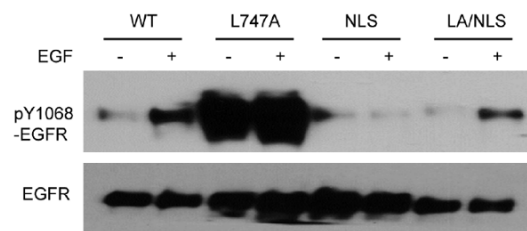

**Figure S7.** Deletion of the EGFR NLS motif abolishes EGFR kinase activity. Cells expressing the indicated plasmids, with or without EGF treatment, were immunoblotted with the indicated antibodies.

## NES L747 mutation of EGFR drives tumorigenesis

**Table S3.** Germline expression of EGFR NES mutant displays defect in breeding

|                                                                                                                                   |                                                                                                                                                                                  |                                                                                                                                                                   |
|-----------------------------------------------------------------------------------------------------------------------------------|----------------------------------------------------------------------------------------------------------------------------------------------------------------------------------|-------------------------------------------------------------------------------------------------------------------------------------------------------------------|
| $F_0$ : L749P or L749S founders (transmitted to $F_1$ )                                                                           |                                                                                                                                                                                  |                                                                                                                                                                   |
| <ul style="list-style-type: none"> <li>• <math>F_1^{+/-} \times F_1^{+/-}</math></li> <li>• <math>F_0 \times WT</math></li> </ul> | <p style="text-align: center;">No pups (cannot get homozygotes)</p> <p style="text-align: center;"><math>F_1</math> offspring#</p> <p style="text-align: center;">Total: 263</p> | <p style="text-align: center;">Predicted heterozygote#</p> <p style="text-align: center;">65.7 (25% probability)</p> <p style="text-align: center;">15 (5.7%)</p> |
| $F_1^{+/-}$ (Heterozygotes) pup                                                                                                   |                                                                                                                                                                                  |                                                                                                                                                                   |
| $X^2 = 39.1$                                                                                                                      | $p > 19.58 = 0.0001$                                                                                                                                                             |                                                                                                                                                                   |
| Pathological phenotype: defect in breeding, hematopoietic tumor (B cell).                                                         |                                                                                                                                                                                  |                                                                                                                                                                   |

**Table S4.** Germline expression of membrane-bound EGFR mutant does not affect breeding

|                                                       |               |    |
|-------------------------------------------------------|---------------|----|
| $F_0$ : LL1012-1013                                   | founders      |    |
| $F_0^{+/-} \times WT$                                 | F1 offsprings | 21 |
|                                                       | Heterozygote  | 4  |
|                                                       | WT            | 17 |
| $F_1^{+/-} \times F_1^{+/-}$                          | F2 offsprings | 24 |
|                                                       | Heterozygote  | 11 |
|                                                       | Homozygote    | 9  |
|                                                       | WT            | 4  |
| $p > 0.05$ , NS                                       |               |    |
| Pathological phenotype: normal in breeding, no tumor. |               |    |



## NES L747 mutation of EGFR drives tumorigenesis

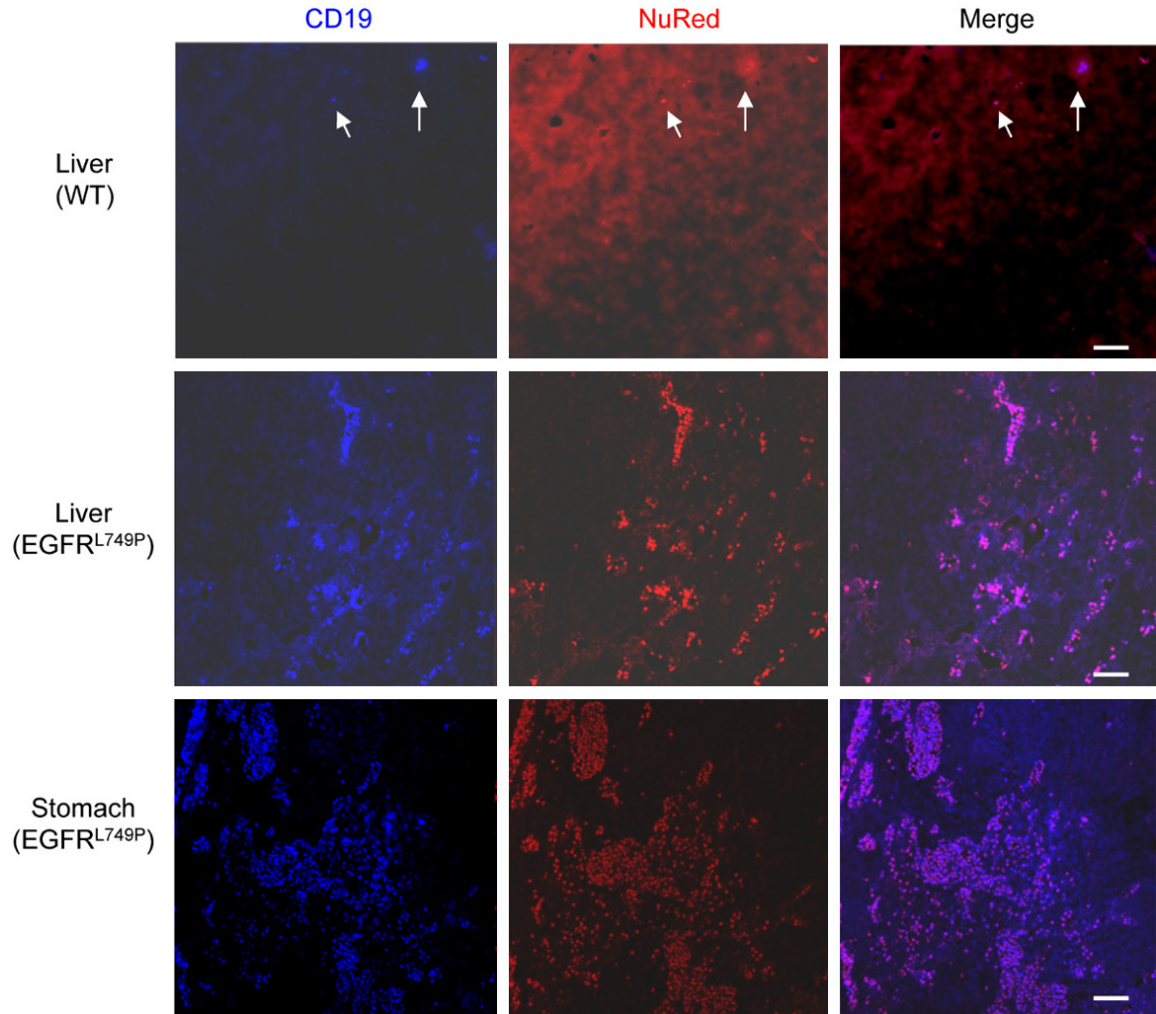

**Figure S8.** Germline expression of EGFR L749 mutant develops hematopoietic B cell lymphoma. Confocal images of B cell lineage marker staining of normal and tumor tissues. Normal and tumor tissues were fixed with paraformaldehyde and permeabilized with 4% NP-40, followed by 2.5% BSA blocking, and stained with Brilliant Violet 510™ anti-mouse CD19 and NucRedDead 647. Representative images were obtained using a LSM710 fluorescence confocal microscope. Bar, 50  $\mu$ m.

**Table S5.** Somatic mutations of EGFR NES found in human B lymphocyte originated tumor (COSMIC database)

| Sample ID | AA mutation | CDS mutation | Primary Tissue             | Histology         | Histology subtype   | (Zygoty)       |
|-----------|-------------|--------------|----------------------------|-------------------|---------------------|----------------|
| 1998470   | T751I       | C2252C > T   | Hematopoietic and lymphoid | Lymphoid neoplasm | Plasma cell myeloma | (Heterozygous) |
| 1092628   | T751I       | C2252C > T   | Hematopoietic and lymphoid | Lymphoid neoplasm | Plasma cell myeloma | (Heterozygous) |
| 1998476   | P753S       | C2357C > T   | Hematopoietic and lymphoid | Lymphoid neoplasm | Hairy cell leukemia | (Homozygous)   |
| 2426650   | A750P       | C?           | Hematopoietic and lymphoid | Lymphoid neoplasm | Plasma cell myeloma | (Heterozygous) |
